# Supplementary material for: Fabrication, Characterization and Evaluation of an Alginate–Lignin Composite for Rare-Earth Elements Recovery
Source: MDPI journal article supplement (doi:10.3390/ma15030944), 2022-01-26
Supplement: s1 [file s1]

## Supplementary materials

# Fabrication, Characterization and Evaluation of an Alginate-Lignin Composite for Rare-Earth Elements Recovery

Dominika Fila, Zbigniew Hubicki and Dorota Kołodyńska

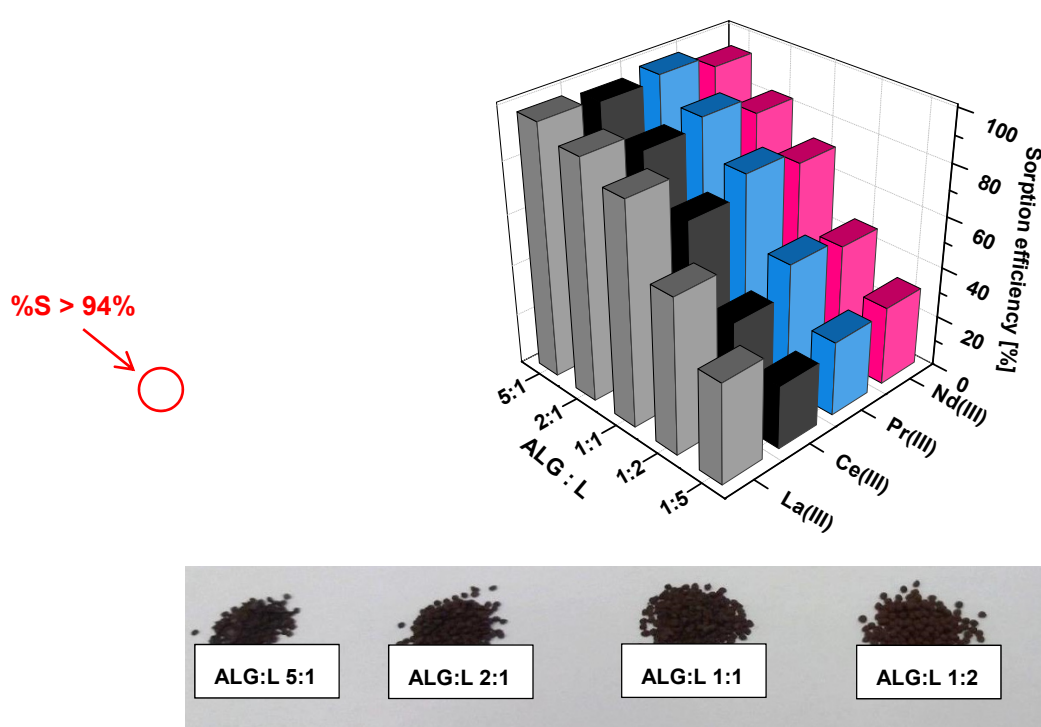

**Figure S1.** Sorption effectiveness results depending on the ALG:L ratios (conditions:  $C_0 = 100 \text{ mg/dm}^3$ ,  $pH = 5$ ,  $m = 0.05 \text{ g}$ ,  $V = 20 \text{ cm}^3$ ,  $t = 480 \text{ min}$ ,  $T = 293 \text{ K}$ ).

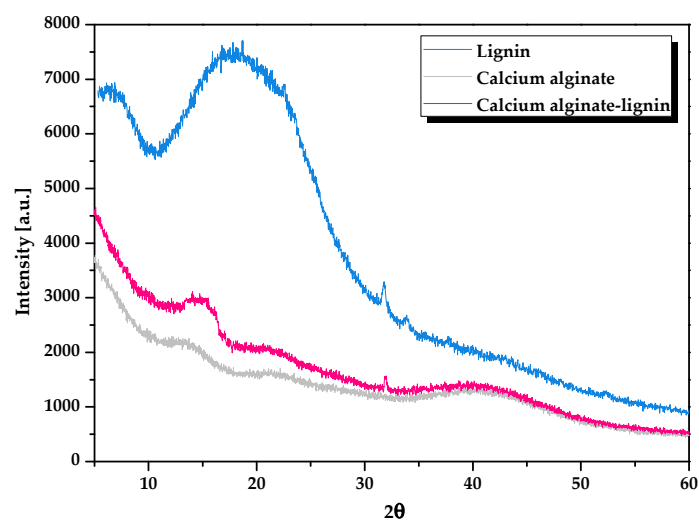

Figure S2. XRD patterns of calcium alginate, lignin, and calcium alginate-lignin composite.

Table S1. Textural parameters of the studied biosorbents.

| Biosorbent                                                 |                                                                                      | Textural parameters           |          |                                  |
|------------------------------------------------------------|--------------------------------------------------------------------------------------|-------------------------------|----------|----------------------------------|
|                                                            |                                                                                      | $S_{BET}$ [m <sup>2</sup> /g] | $D$ [nm] | $V_{total}$ [cm <sup>3</sup> /g] |
| Calcium alginate                                           |   | 4.707                         | 3.144    | $0.773 \times 10^{-2}$           |
| Lignin                                                     |  | 1.918                         | 6.107    | $0.385 \times 10^{-2}$           |
| Calcium alginate-lignin (ALG <sub>5</sub> L <sub>1</sub> ) |  | 8.018                         | 2.975    | $1.070 \times 10^{-2}$           |

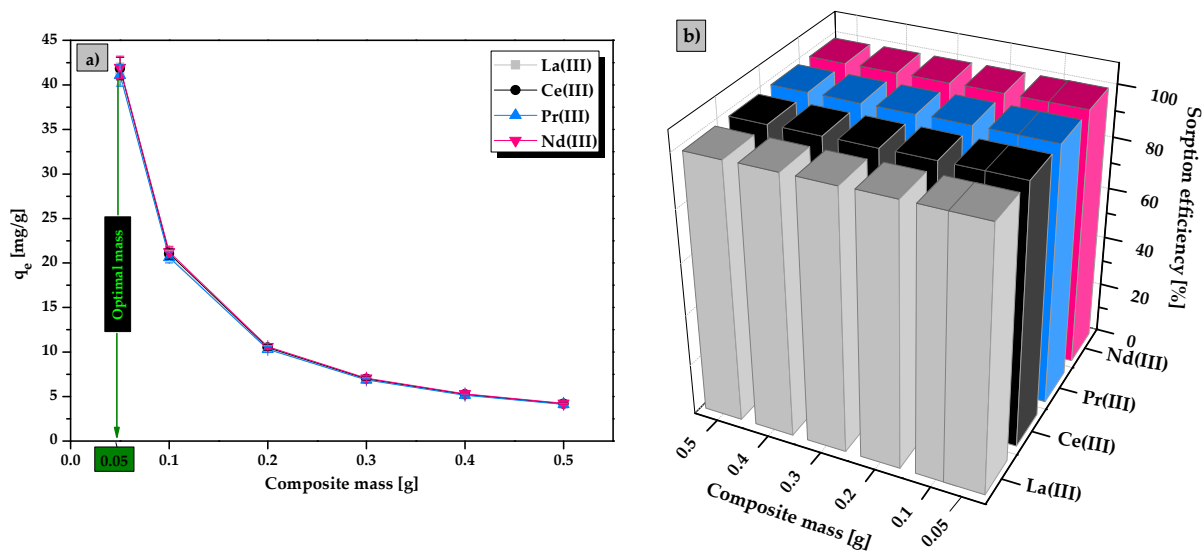

Figure S3. Influence of composite mass on La(III), Ce(III), Pr(III), and Nd(III) ions sorption by the ALG<sub>5</sub>L<sub>1</sub> composite (conditions:  $C_0 = 100$  mg/dm<sup>3</sup>,  $pH = 5$ ,  $m = 0.05$ – $0.5$  g,  $V = 20$  cm<sup>3</sup>,  $t = 480$  min,  $T = 293$  K).

**Table S2.** Calculated thermodynamic parameters for the La(III), Ce(III), Pr(III), and Nd(III) ions sorption onto ALG<sub>5</sub>L<sub>1</sub> composite.

| ALG <sub>5</sub> L <sub>1</sub> +<br>sorbed metal<br>ions | $\Delta H^\circ$<br>[kJ/mol] | $\Delta S^\circ$<br>[J/mol·K] | $R^2$ | $\Delta G^\circ$ [kJ/mol] |        |        |
|-----------------------------------------------------------|------------------------------|-------------------------------|-------|---------------------------|--------|--------|
|                                                           |                              |                               |       | 293 K                     | 313 K  | 333 K  |
| ALG <sub>5</sub> L <sub>1</sub> + La(III)                 | 7.31                         | 32.27                         | 0.985 | -18.94                    | -20.83 | -22.52 |
| ALG <sub>5</sub> L <sub>1</sub> + Ce(III)                 | 7.76                         | 33.79                         | 0.973 | -18.93                    | -20.89 | -22.56 |
| ALG <sub>5</sub> L <sub>1</sub> + Pr(III)                 | 6.11                         | 25.39                         | 0.974 | -18.19                    | -19.74 | -21.51 |
| ALG <sub>5</sub> L <sub>1</sub> + Nd(III)                 | 8.45                         | 32.20                         | 0.934 | -17.89                    | -19.45 | -21.50 |

**Table S3.** Calculated thermodynamic parameters for La(III), Ce(III), Pr(III), and Nd(III) ions sorption onto lignin.

| Lignin +<br>sorbed metal<br>ions | $\Delta H^\circ$<br>[kJ/mol] | $\Delta S^\circ$<br>[J/mol·K] | $R^2$ | $\Delta G^\circ$ [kJ/mol] |        |        |
|----------------------------------|------------------------------|-------------------------------|-------|---------------------------|--------|--------|
|                                  |                              |                               |       | 293 K                     | 313 K  | 333 K  |
| Lignin + La(III)                 | 3.98                         | 1.03                          | 1.000 | -13.15                    | -14.32 | -15.49 |
| Lignin + Ce(III)                 | 6.79                         | 7.70                          | 0.995 | -12.30                    | -13.54 | -14.90 |
| Lignin + Pr(III)                 | 9.27                         | 18.20                         | 0.998 | -12.91                    | -14.38 | -15.93 |
| Lignin + Nd(III)                 | 4.65                         | 0.71                          | 0.999 | -11.98                    | -13.10 | -14.25 |

**Table S4.** Calculated kinetic parameters for Ce(III) ions sorption onto the ALG5L1 composite.

| Kinetic model | Equations                                                                                       | Parameter                           | ALG5L1 |       |       |       |       |
|---------------|-------------------------------------------------------------------------------------------------|-------------------------------------|--------|-------|-------|-------|-------|
|               |                                                                                                 | $C_0$ [mg/dm <sup>3</sup> ]         | 25     | 50    | 100   | 150   | 200   |
| PFO           | $\log(q_1 - q_t) = \log(q_1) - \frac{k_1}{2.303} \times t$                                      | $q^{exp}$ [mg/g]                    | 9.56   | 19.85 | 40.65 | 61.04 | 86.13 |
|               |                                                                                                 | $q^1$ [mg/g]                        | 5.50   | 17.08 | 38.62 | 48.57 | 76.94 |
|               |                                                                                                 | $k_1 \times 10^{-2}$ [1/min]        | 2.15   | 2.18  | 1.02  | 0.37  | 0.26  |
|               |                                                                                                 | $R^2$                               | 0.883  | 0.967 | 0.996 | 0.936 | 0.985 |
|               |                                                                                                 |                                     |        |       |       |       |       |
| PSO           | $\frac{t}{q_t} = \frac{1}{k_2 \times q_2^2} + \frac{1}{q_2} \times t$<br>$h = k_2 \times q_2^2$ | $q^2$ [mg/g]                        | 10.14  | 23.20 | 42.88 | 65.88 | 91.62 |
|               |                                                                                                 | $k_2 \times 10^{-2}$ [g/mg·min]     | 0.49   | 0.076 | 0.045 | 0.014 | 0.007 |
|               |                                                                                                 | $h$ [mg/g·min]                      | 0.50   | 0.41  | 0.83  | 0.61  | 0.62  |
|               |                                                                                                 | $R^2$                               | 0.997  | 0.997 | 0.998 | 0.992 | 0.984 |
|               |                                                                                                 |                                     |        |       |       |       |       |
| IPD           | $q_t = k_i \times t^{1/2} + C_i$                                                                | $k_{i1}$ [mg/g·min <sup>1/2</sup> ] | 0.92   | 1.59  | 2.05  | 3.28  | 1.80  |
|               |                                                                                                 | $C_1$                               | 0.45   | 0.68  | 1.18  | 3.30  | 0.37  |
|               |                                                                                                 | $R^2$                               | 0.974  | 0.953 | 0.986 | 0.988 | 0.904 |
|               |                                                                                                 | $k_{i2}$ [mg/g·min <sup>1/2</sup> ] | 0.89   | 1.96  | 2.50  | 2.78  | 3.33  |
|               |                                                                                                 | $C_2$                               | 0.70   | 1.30  | 0.85  | 1.73  | 3.15  |
|               |                                                                                                 | $R^2$                               | 0.859  | 0.955 | 0.980 | 0.981 | 0.996 |
|               |                                                                                                 | $k_{i3}$ [mg/g·min <sup>1/2</sup> ] | 0.003  | 0.013 | 0.17  | 0.45  | 1.41  |
|               |                                                                                                 | $C_3$                               | 9.49   | 19.57 | 35.16 | 44.38 | 33.63 |
|               |                                                                                                 | $R^2$                               | 0.978  | 0.939 | 0.568 | 0.925 | 0.980 |
|               |                                                                                                 |                                     |        |       |       |       |       |
| Boyd          | $\frac{q_t}{q_e} = 1 - \frac{6}{\pi^2} \exp(-Bt)$<br>$F = \frac{q_t}{q_e}$                      | $B$                                 | 6.24   | 6.75  | 4.52  | 2.79  | 1.98  |
|               |                                                                                                 | $R^2$                               | 0.891  | 0.971 | 0.992 | 0.873 | 0.997 |
| DW            | $\log(1 - F^2) = -\frac{K}{2.303t}$                                                             | $K$                                 | 0.020  | 0.020 | 0.009 | 0.003 | 0.002 |
|               |                                                                                                 | $R^2$                               | 0.896  | 0.973 | 0.990 | 0.972 | 0.997 |

**Table S5.** Calculated kinetic parameters for Pr(III) ions sorption onto the ALG<sub>5</sub>L<sub>1</sub> composite.

| Kinetic model | Equations                                                                                       | Parameter                           | ALG <sub>5</sub> L <sub>1</sub> |       |       |       |       |
|---------------|-------------------------------------------------------------------------------------------------|-------------------------------------|---------------------------------|-------|-------|-------|-------|
|               |                                                                                                 | $C_0$ [mg/dm <sup>3</sup> ]         | 25                              | 50    | 100   | 150   | 200   |
| PFO           | $\log(q_1 - q_t) = \log(q_1) - \frac{k_1}{2.303} \times t$                                      | $q^{exp}$ [mg/g]                    | 9.15                            | 19.10 | 39.33 | 60.06 | 74.65 |
|               |                                                                                                 | $q^1$ [mg/g]                        | 5.25                            | 17.06 | 39.37 | 50.67 | 63.91 |
|               |                                                                                                 | $k_1 \times 10^{-2}$ [1/min]        | 2.46                            | 2.36  | 1.05  | 0.39  | 0.28  |
|               |                                                                                                 | $R^2$                               | 0.899                           | 0.987 | 0.995 | 0.965 | 0.978 |
|               |                                                                                                 |                                     |                                 |       |       |       |       |
| PSO           | $\frac{t}{q_t} = \frac{1}{k_2 \times q_2^2} + \frac{1}{q_2} \times t$<br>$h = k_2 \times q_2^2$ | $q^2$ [mg/g]                        | 9.64                            | 20.84 | 42.22 | 64.86 | 79.26 |
|               |                                                                                                 | $k_2 \times 10^{-2}$ [g/mg·min]     | 0.58                            | 0.15  | 0.035 | 0.014 | 0.010 |
|               |                                                                                                 | $h$ [mg/g·min]                      | 0.54                            | 0.66  | 0.62  | 0.59  | 0.62  |
|               |                                                                                                 | $R^2$                               | 0.998                           | 0.995 | 0.996 | 0.996 | 0.991 |
|               |                                                                                                 |                                     |                                 |       |       |       |       |
| IPD           | $q_t = k_i \times t^{1/2} + C_i$                                                                | $k_{i1}$ [mg/g·min <sup>1/2</sup> ] | 1.15                            | 1.63  | 1.24  | 2.16  | 4.03  |
|               |                                                                                                 | $C_1$                               | 0.80                            | 1.11  | 0.51  | 1.66  | 4.09  |
|               |                                                                                                 | $R^2$                               | 0.970                           | 0.901 | 0.993 | 0.821 | 0.912 |
|               |                                                                                                 | $k_{i2}$ [mg/g·min <sup>1/2</sup> ] | 0.80                            | 1.78  | 2.24  | 2.57  | 2.75  |
|               |                                                                                                 | $C_2$                               | 1.13                            | 0.27  | 2.14  | 2.26  | 2.78  |
|               |                                                                                                 | $R^2$                               | 0.871                           | 0.953 | 0.995 | 0.988 | 0.981 |
|               |                                                                                                 | $k_{i3}$ [mg/g·min <sup>1/2</sup> ] | 0.001                           | 0.015 | 0.21  | 0.49  | 1.06  |
|               |                                                                                                 | $C_3$                               | 9.12                            | 18.79 | 32.88 | 42.42 | 35.53 |
|               |                                                                                                 | $R^2$                               | 0.974                           | 0.735 | 0.482 | 0.858 | 0.975 |
| Boyd          | $\frac{q_t}{q_e} = 1 - \frac{6}{\pi^2} \exp(-Bt)$<br>$F = \frac{q_t}{q_e}$                      | $B$                                 | 7.10                            | 7.46  | 4.40  | 3.05  | 2.21  |
|               |                                                                                                 | $R^2$                               | 0.905                           | 0.989 | 0.985 | 0.913 | 0.998 |
| DW            | $\log(1 - F^2) = -\frac{K}{2.303t}$                                                             | $K$                                 | 0.023                           | 0.022 | 0.009 | 0.003 | 0.002 |
|               |                                                                                                 | $R^2$                               | 0.909                           | 0.990 | 0.982 | 0.985 | 0.998 |

**Table S6.** Calculated kinetic parameters for Nd(III) ions sorption onto the ALG<sub>5</sub>L<sub>1</sub> composite.

| Kinetic model | Equations                                                                                       | Parameter                           | ALG <sub>5</sub> L <sub>1</sub> |       |       |       |       |
|---------------|-------------------------------------------------------------------------------------------------|-------------------------------------|---------------------------------|-------|-------|-------|-------|
|               |                                                                                                 | $C_0$ [mg/dm <sup>3</sup> ]         | 25                              | 50    | 100   | 150   | 200   |
| PFO           | $\log(q_1 - q_t) = \log(q_1) - \frac{k_1}{2.303} \times t$                                      | $q^{exp}$ [mg/g]                    | 8.43                            | 20.13 | 42.62 | 65.71 | 78.16 |
|               |                                                                                                 | $q^1$ [mg/g]                        | 6.20                            | 16.75 | 41.06 | 51.20 | 64.59 |
|               |                                                                                                 | $k_1 \times 10^{-2}$ [1/min]        | 2.22                            | 2.12  | 1.00  | 0.35  | 0.26  |
|               |                                                                                                 | $R^2$                               | 0.954                           | 0.955 | 0.978 | 0.938 | 0.966 |
|               |                                                                                                 |                                     |                                 |       |       |       |       |
| PSO           | $\frac{t}{q_t} = \frac{1}{k_2 \times q_2^2} + \frac{1}{q_2} \times t$<br>$h = k_2 \times q_2^2$ | $q^2$ [mg/g]                        | 9.01                            | 22.59 | 44.23 | 68.38 | 80.20 |
|               |                                                                                                 | $k_2 \times 10^{-2}$ [g/mg·min]     | 0.46                            | 0.11  | 0.058 | 0.019 | 0.013 |
|               |                                                                                                 | $h$ [mg/g·min]                      | 0.38                            | 0.54  | 1.13  | 0.90  | 0.81  |
|               |                                                                                                 | $R^2$                               | 0.997                           | 0.992 | 0.997 | 0.997 | 0.986 |
|               |                                                                                                 |                                     |                                 |       |       |       |       |
| IPD           | $q_t = k_i \times t^{1/2} + C_i$                                                                | $k_{i1}$ [mg/g·min <sup>1/2</sup> ] | 0.87                            | 1.65  | 2.40  | 2.29  | 3.89  |
|               |                                                                                                 | $C_1$                               | 0.58                            | 1.40  | 1.63  | 0.34  | 1.38  |
|               |                                                                                                 | $R^2$                               | 0.929                           | 0.986 | 0.880 | 0.797 | 0.939 |
|               |                                                                                                 | $k_{i2}$ [mg/g·min <sup>1/2</sup> ] | 0.74                            | 2.00  | 2.10  | 2.53  | 2.80  |
|               |                                                                                                 | $C_2$                               | 0.71                            | 1.47  | 4.68  | 7.98  | 4.02  |
|               |                                                                                                 | $R^2$                               | 0.910                           | 0.931 | 0.983 | 0.971 | 0.985 |
|               |                                                                                                 | $k_{i3}$ [mg/g·min <sup>1/2</sup> ] | 0.005                           | 0.016 | 0.31  | 0.52  | 1.09  |
|               |                                                                                                 | $C_3$                               | 8.32                            | 19.79 | 32.88 | 46.53 | 37.21 |
|               |                                                                                                 | $R^2$                               | 0.709                           | 0.745 | 0.472 | 0.889 | 0.977 |
|               |                                                                                                 |                                     |                                 |       |       |       |       |
| Boyd          | $\frac{q_t}{q_e} = 1 - \frac{6}{\pi^2} \exp(-Bt)$<br>$F = \frac{q_t}{q_e}$                      | $B$                                 | 6.62                            | 6.21  | 4.43  | 2.70  | 1.96  |
|               |                                                                                                 | $R^2$                               | 0.960                           | 0.959 | 0.959 | 0.876 | 0.994 |
| DW            | $\log(1 - F^2) = -\frac{K}{2.303t}$                                                             | $K$                                 | 0.020                           | 0.019 | 0.009 | 0.003 | 0.002 |
|               |                                                                                                 | $R^2$                               | 0.962                           | 0.960 | 0.955 | 0.971 | 0.995 |

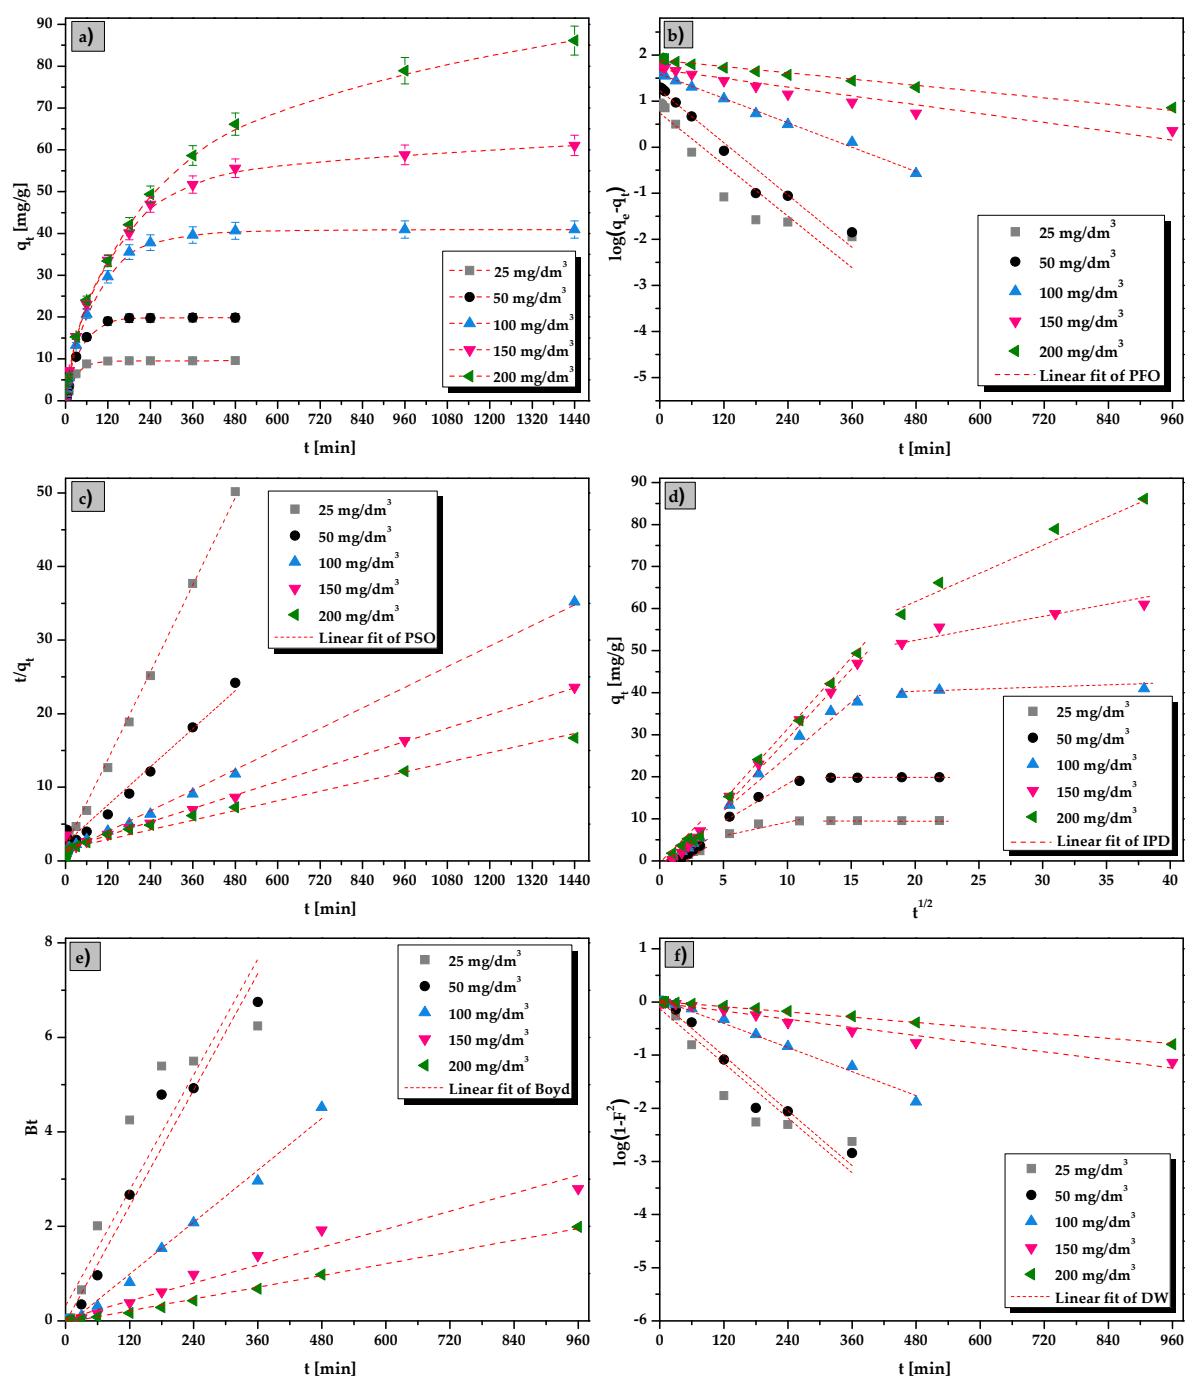

**Figure S4.** (a) Influence of interaction time and linear fitting of kinetic models: (b) PFO, (c) PSO, (d) IPD, (e) Boyd, and (f) DW for Ce(III) ions sorption on the ALG<sub>5</sub>L<sub>1</sub> composite.

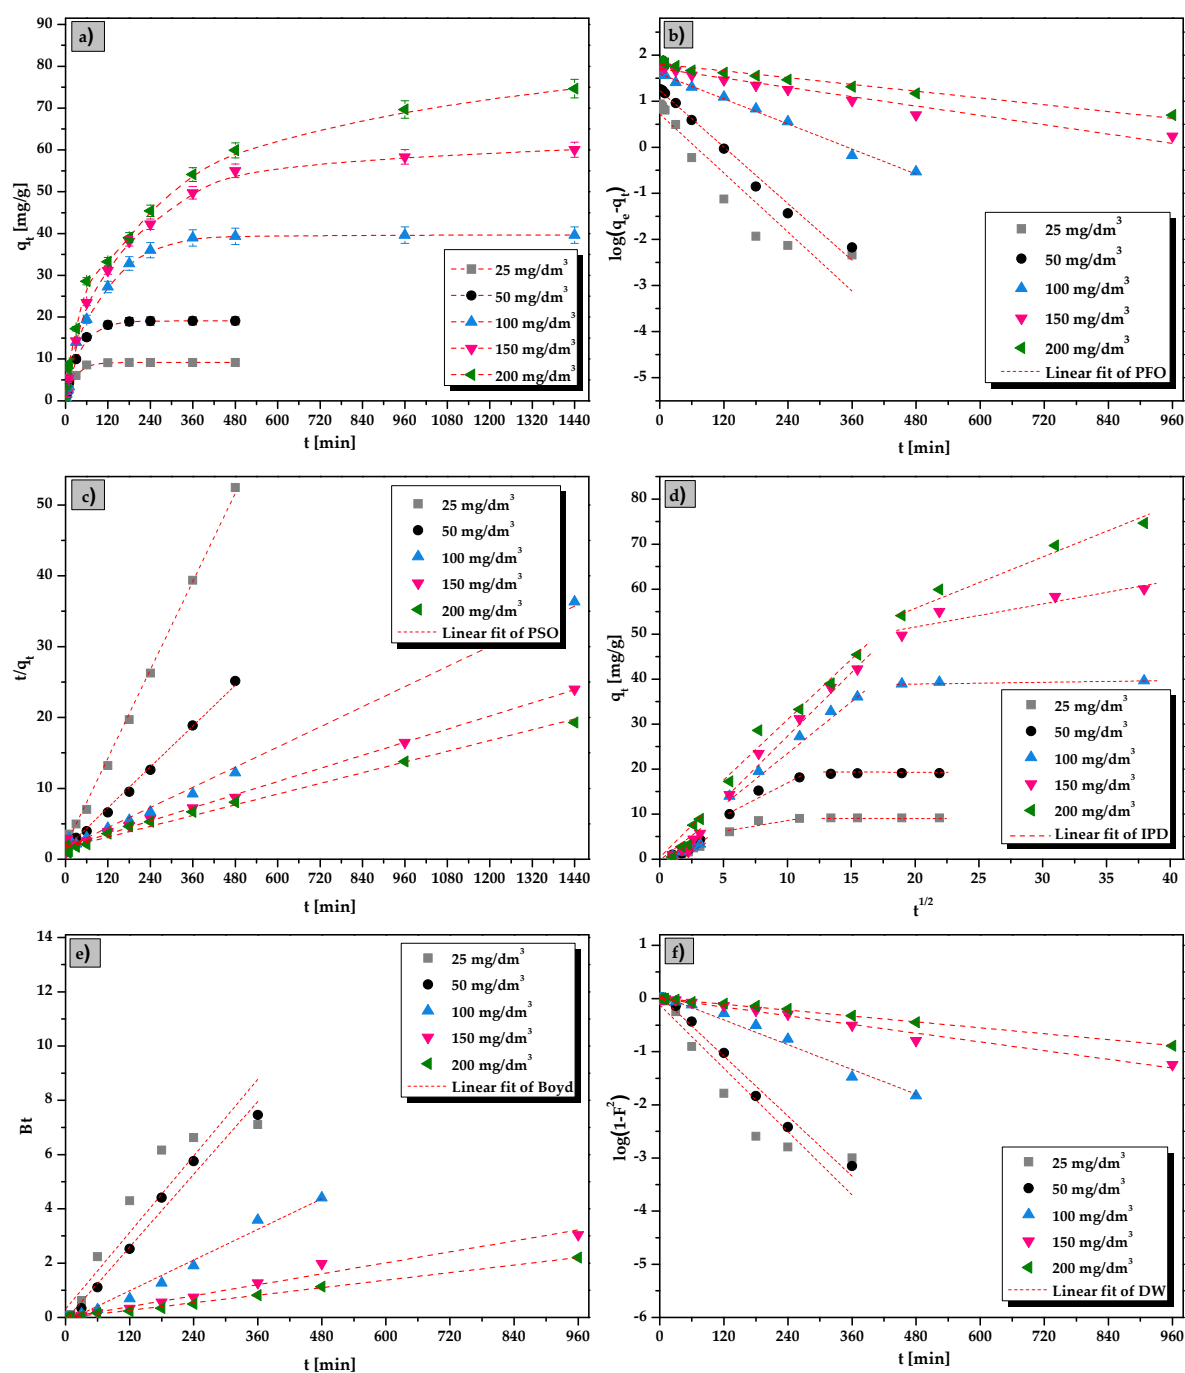

**Figure S5.** (a) Influence of interaction time and linear fitting of kinetic models: (b) PFO, (c) PSO, (d) IPD, (e) Boyd, and (f) DW for Pr(III) ions sorption on the ALGSL1 composite.



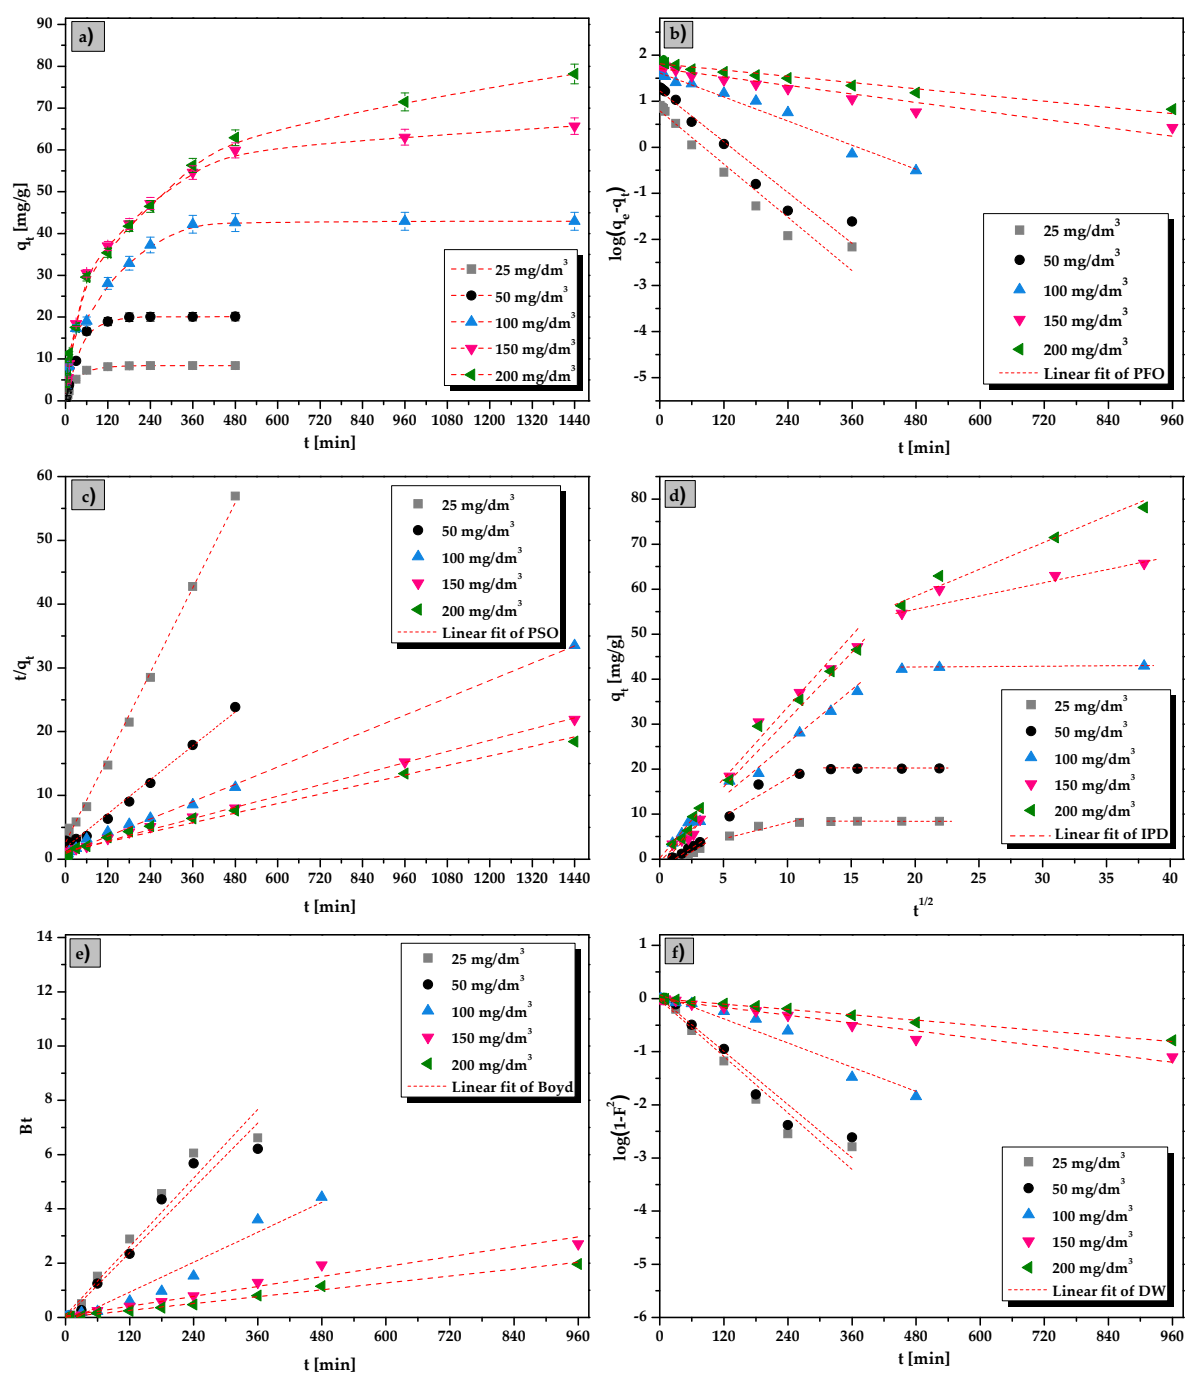

**Figure S6.** (a) Influence of interaction time and linear fitting of kinetic models: (b) PFO, (c) PSO, (d) IPD, (e) Boyd, and (f) DW for Nd(III) ions sorption on the ALG5L1 composite.

**Table S7.** Calculated kinetic parameters for La(III), Ce(III), Pr(III), and Nd(III) ions sorption onto raw lignin for  $C_0=100$  mg/dm<sup>3</sup>.

| Kinetic model | Equations                                                                                       | Parameter                              | Lignin  |         |         |         |
|---------------|-------------------------------------------------------------------------------------------------|----------------------------------------|---------|---------|---------|---------|
|               |                                                                                                 | Ions                                   | La(III) | Ce(III) | Pr(III) | Nd(III) |
| PFO           | $\log(q_1 - q_t) = \log(q_1) - \frac{k_1}{2.303} \times t$                                      | $q_{exp}$<br>[mg/g]                    | 22.72   | 23.66   | 20.27   | 18.85   |
|               |                                                                                                 | $q^1$<br>[mg/g]                        | 7.87    | 13.05   | 7.74    | 7.11    |
|               |                                                                                                 | $k_1 \times 10^{-2}$<br>[1/min]        | 1.60    | 1.87    | 1.98    | 1.38    |
|               |                                                                                                 | $R^2$                                  | 0.946   | 0.957   | 0.899   | 0.962   |
| PSO           | $\frac{t}{q_t} = \frac{1}{k_2 \times q_2^2} + \frac{1}{q_2} \times t$<br>$h = k_2 \times q_2^2$ | $q^2$<br>[mg/g]                        | 22.83   | 24.03   | 20.49   | 18.93   |
|               |                                                                                                 | $k_2 \times 10^{-2}$<br>[g/mg·min]     | 1.25    | 0.60    | 1.20    | 1.11    |
|               |                                                                                                 | $h$<br>[mg/g·min]                      | 5.97    | 3.46    | 5.04    | 4.00    |
|               |                                                                                                 | $R^2$                                  | 0.999   | 0.999   | 1.000   | 0.999   |
| IPD           | $q_t = k_i \times t^{1/2} + C_i$                                                                | $k_{i1}$<br>[mg/g·min <sup>1/2</sup> ] | 4.10    | 3.56    | 4.33    | 2.53    |
|               |                                                                                                 | $C_1$                                  | 5.37    | 2.76    | 1.24    | 5.86    |
|               |                                                                                                 | $R^2$                                  | 0.937   | 0.955   | 0.963   | 0.986   |
|               |                                                                                                 | $k_{i2}$<br>[mg/g·min <sup>1/2</sup> ] | 0.47    | 0.95    | 0.65    | 0.54    |
|               |                                                                                                 | $C_2$                                  | 16.57   | 12.53   | 13.42   | 12.01   |
|               |                                                                                                 | $R^2$                                  | 0.938   | 0.911   | 0.918   | 0.965   |
|               |                                                                                                 | $k_{i3}$<br>[mg/g·min <sup>1/2</sup> ] | 0.19    | 0.24    | 0.09    | 0.19    |
|               |                                                                                                 | $C_3$                                  | 19.30   | 19.42   | 18.75   | 15.49   |
| Boyd          | $\frac{q_t}{q_e} = 1 - \frac{6}{\pi^2} \exp(-Bt)$<br>$F = \frac{q_t}{q_e}$                      | $B$                                    | 4.53    | 4.94    | 4.76    | 3.69    |
|               |                                                                                                 | $R^2$                                  | 0.956   | 0.963   | 0.911   | 0.972   |
| DW            | $\log(1 - F^2) = -\frac{K}{2.303t}$                                                             | $K$                                    | 0.015   | 0.017   | 0.019   | 0.013   |
|               |                                                                                                 | $R^2$                                  | 0.960   | 0.960   | 0.917   | 0.976   |

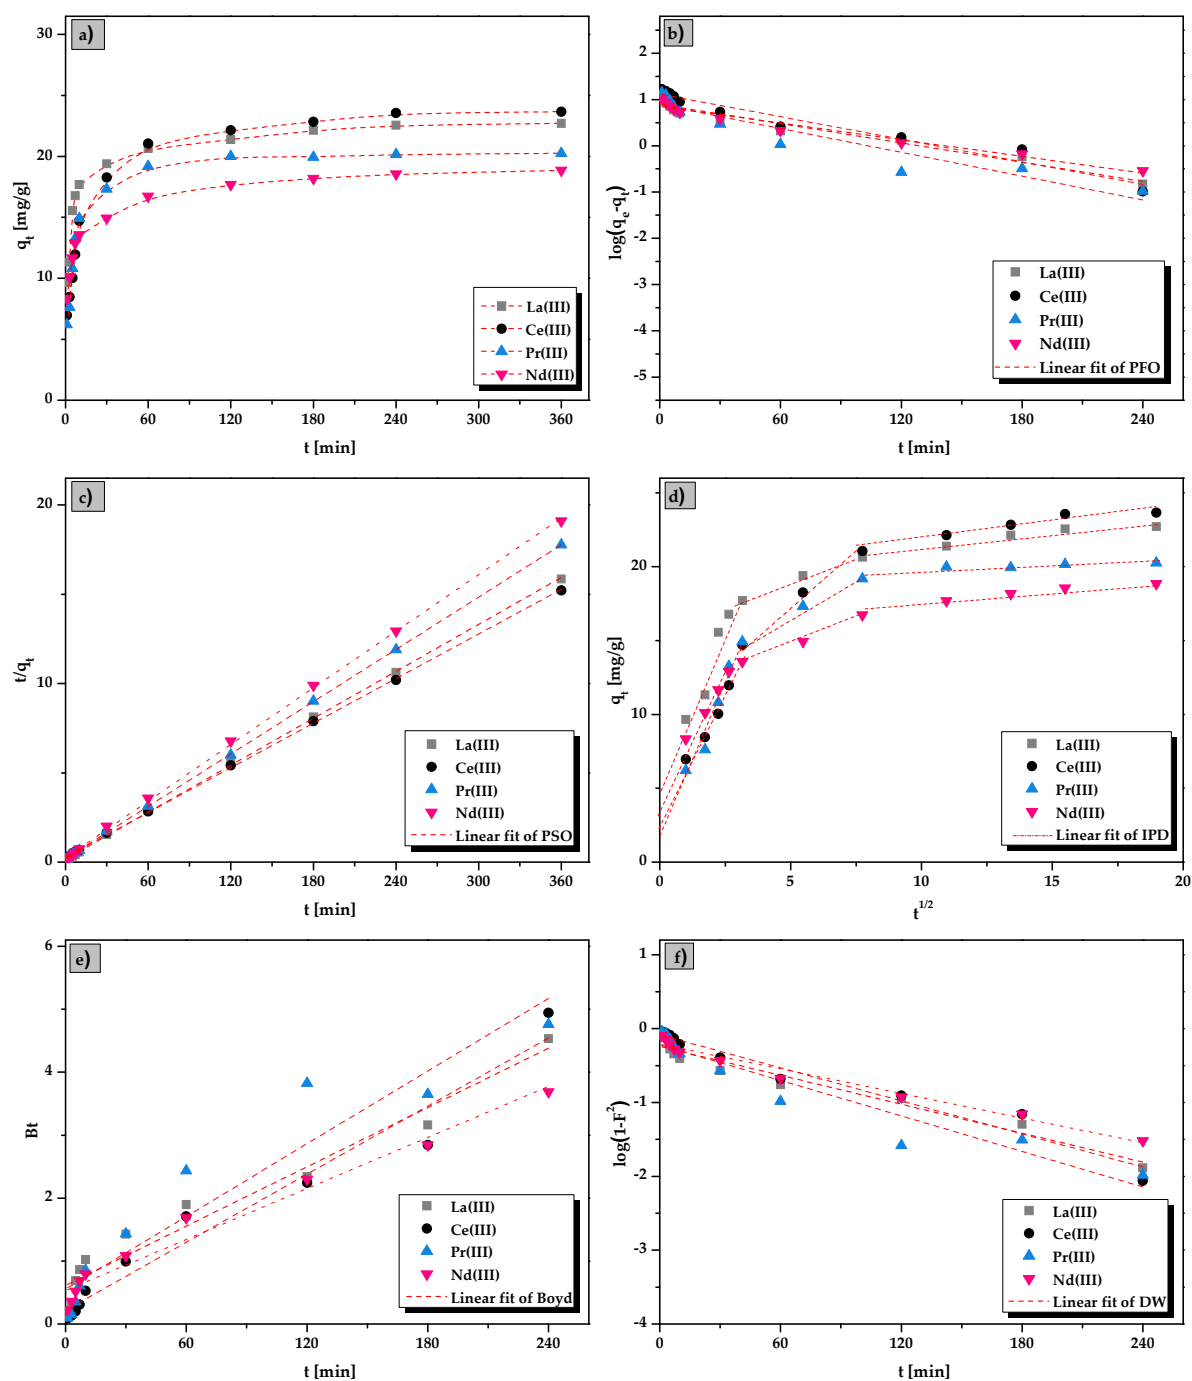

**Figure S7.** (a) Influence of interaction time and linear fitting of kinetic models: (b) PFO, (c) PSO, (d) IPD, (e) Boyd, and (f) DW for La(III), Ce(III), Pr(III), and Nd(III) ions sorption onto raw lignin for  $C_0 = 100 \text{ mg/dm}^3$ .

**Table S8.** Calculated isotherm parameters for Ce(III), Pr(III), and Nd(III) ions sorption onto the ALG<sub>5</sub>L<sub>1</sub> composite.

| Isotherm model      | Parameter                                                      | Ce(III) |       |       | Pr(III) |       |       | Nd(III) |       |        |
|---------------------|----------------------------------------------------------------|---------|-------|-------|---------|-------|-------|---------|-------|--------|
|                     |                                                                | 293     | 313   | 333   | 293     | 313   | 333   | 293     | 313   | 333    |
| Langmuir            | $q^{\text{exp}}$<br>[mg/g]                                     | 93.83   | 96.58 | 97.97 | 92.99   | 97.85 | 97.98 | 96.28   | 98.46 | 98.68  |
|                     | $q_m$<br>[mg/g]                                                | 94.56   | 96.68 | 97.66 | 92.02   | 95.71 | 97.30 | 94.89   | 97.43 | 97.72  |
|                     | $K_L$<br>[dm <sup>3</sup> /mg]                                 | 0.27    | 0.32  | 0.33  | 0.15    | 0.17  | 0.22  | 0.13    | 0.16  | 0.20   |
|                     | $R^2$                                                          | 0.998   | 0.997 | 0.998 | 0.995   | 0.993 | 0.997 | 0.993   | 0.994 | 0.996  |
|                     | $\chi^2$                                                       | 0.005   | 0.013 | 0.024 | 0.099   | 0.171 | 0.050 | 0.157   | 0.101 | 0.073  |
| Freundlich          | $K_F$<br>[mg/g]                                                | 31.26   | 34.36 | 36.54 | 30.47   | 29.93 | 31.61 | 31.40   | 28.54 | 28.75  |
|                     | $n$                                                            | 4.43    | 4.68  | 4.83  | 4.74    | 4.34  | 4.38  | 4.88    | 4.18  | 4.10   |
|                     | $R^2$                                                          | 0.876   | 0.864 | 0.945 | 0.934   | 0.840 | 0.864 | 0.965   | 0.829 | 0.823  |
|                     | $\chi^2$                                                       | 1.973   | 1.847 | 2.102 | 0.724   | 1.400 | 2.541 | 0.169   | 1.317 | 2.071  |
| Temkin              | $A \times 10^2$<br>[dm <sup>3</sup> /g]                        | 0.89    | 1.70  | 3.30  | 1.82    | 0.76  | 0.99  | 3.02    | 0.52  | 0.48   |
|                     | $B$<br>[J/mol]                                                 | 9.380   | 9.036 | 8.526 | 8.022   | 9.423 | 9.441 | 7.661   | 9.885 | 10.203 |
|                     | $R^2$                                                          | 0.977   | 0.968 | 0.991 | 0.984   | 0.974 | 0.985 | 0.961   | 0.969 | 0.976  |
|                     | $\chi^2$                                                       | 0.003   | 0.004 | 0.036 | 0.348   | 0.148 | 0.012 | 0.938   | 0.122 | 0.022  |
| Dubinin-Raduskevich | $X_m \times 10^{-3}$<br>[mg/g]                                 | 2.42    | 2.36  | 2.37  | 2.11    | 2.52  | 2.58  | 2.00    | 2.57  | 2.67   |
|                     | $\beta \times 10^{-3}$<br>[mol <sup>2</sup> /kJ <sup>2</sup> ] | 1.73    | 1.58  | 1.49  | 1.57    | 1.85  | 1.80  | 1.45    | 1.94  | 1.98   |
|                     | $E$<br>[kJ/mol]                                                | 16.98   | 17.78 | 18.31 | 17.82   | 16.44 | 16.66 | 18.57   | 16.07 | 15.90  |
|                     | $R^2$                                                          | 0.898   | 0.880 | 0.981 | 0.963   | 0.884 | 0.911 | 0.978   | 0.863 | 0.858  |
|                     | $\chi^2$                                                       | 0.420   | 0.237 | 0.310 | 0.016   | 0.331 | 0.833 | 0.354   | 0.262 | 0.613  |

**Table S9.** Calculated isotherm parameters for La(III), Ce(III), Pr(III), and Nd(III) ions sorption onto raw lignin.

| Isotherm<br>model              | Parameter<br>$T$ [K]                                           | La(III) |       |       | Ce(III) |       |       | Pr(III) |       |       | Nd(III) |       |       |
|--------------------------------|----------------------------------------------------------------|---------|-------|-------|---------|-------|-------|---------|-------|-------|---------|-------|-------|
|                                |                                                                | 293     | 313   | 333   | 293     | 313   | 333   | 293     | 313   | 333   | 293     | 313   | 333   |
|                                | $q_{exp}$<br>[mg/g]                                            | 34.69   | 36.25 | 37.98 | 26.41   | 30.08 | 37.39 | 32.22   | 36.90 | 40.74 | 24.07   | 27.57 | 30.06 |
| Langmuir                       | $q_m$<br>[mg/g]                                                | 35.93   | 37.24 | 39.08 | 27.06   | 30.84 | 38.89 | 33.15   | 37.85 | 41.89 | 24.91   | 28.34 | 31.00 |
|                                | $K_L$<br>[dm <sup>3</sup> /mg]                                 | 0.054   | 0.060 | 0.069 | 0.082   | 0.084 | 0.044 | 0.052   | 0.055 | 0.063 | 0.051   | 0.042 | 0.041 |
|                                | $R^2$                                                          | 0.997   | 0.996 | 0.997 | 0.999   | 0.999 | 0.997 | 0.996   | 0.996 | 0.999 | 0.999   | 0.995 | 0.994 |
|                                | $\chi^2$                                                       | 0.003   | 0.007 | 0.002 | 0.001   | 0.001 | 0.004 | 0.013   | 0.018 | 0.008 | 0.002   | 0.020 | 0.029 |
|                                |                                                                |         |       |       |         |       |       |         |       |       |         |       |       |
| Freundlich                     | $K_F$<br>[mg/g]                                                | 10.01   | 10.14 | 11.31 | 8.62    | 9.54  | 7.77  | 6.98    | 7.30  | 6.83  | 5.15    | 5.97  | 6.39  |
|                                | $n$                                                            | 4.66    | 4.51  | 4.69  | 5.06    | 4.91  | 3.65  | 3.67    | 3.41  | 3.00  | 3.66    | 3.80  | 3.75  |
|                                | $R^2$                                                          | 0.977   | 0.989 | 0.989 | 0.942   | 0.960 | 0.942 | 0.953   | 0.951 | 0.904 | 0.956   | 0.988 | 0.986 |
|                                | $\chi^2$                                                       | 0.070   | 0.104 | 0.154 | 0.231   | 0.291 | 0.343 | 0.306   | 0.534 | 1.410 | 0.346   | 0.117 | 1.286 |
| Temkin                         | $A$<br>[dm <sup>3</sup> /g]                                    | 6.30    | 9.55  | 15.10 | 8.03    | 8.61  | 1.72  | 2.69    | 2.32  | 1.49  | 1.66    | 2.11  | 2.19  |
|                                | $B$<br>[J/mol]                                                 | 4.37    | 4.31  | 4.32  | 3.34    | 3.77  | 5.71  | 4.63    | 5.47  | 6.73  | 3.78    | 3.99  | 4.31  |
|                                | $R^2$                                                          | 0.947   | 0.952 | 0.956 | 0.973   | 0.990 | 0.987 | 0.991   | 0.995 | 0.987 | 0.978   | 0.991 | 0.990 |
|                                | $\chi^2$                                                       | 0.005   | 0.014 | 0.005 | 0.040   | 0.039 | 0.005 | 0.001   | 0.001 | 0.069 | 0.028   | 0.007 | 0.337 |
|                                |                                                                |         |       |       |         |       |       |         |       |       |         |       |       |
| Dubinin-<br>Radusch-<br>kevich | $X_m \times 10^{-3}$<br>[mg/g]                                 | 0.81    | 0.85  | 0.88  | 0.65    | 0.75  | 1.08  | 0.92    | 1.13  | 1.49  | 0.71    | 0.74  | 0.81  |
|                                | $\beta \times 10^{-3}$<br>[mol <sup>2</sup> /kJ <sup>2</sup> ] | 1.95    | 1.94  | 1.83  | 1.95    | 1.96  | 2.74  | 2.61    | 2.79  | 3.27  | 2.74    | 2.55  | 2.57  |
|                                | $E$<br>[kJ/mol]                                                | 16.01   | 16.07 | 16.54 | 15.99   | 15.96 | 13.51 | 13.84   | 13.38 | 12.37 | 13.52   | 13.99 | 13.95 |
|                                | $R^2$                                                          | 0.959   | 0.982 | 0.985 | 0.970   | 0.986 | 0.964 | 0.977   | 0.979 | 0.944 | 0.979   | 0.998 | 0.998 |
|                                | $\chi^2$                                                       | 0.004   | 0.004 | 0.001 | 0.095   | 0.107 | 0.105 | 0.0693  | 0.156 | 0.737 | 0.135   | 0.006 | 0.009 |

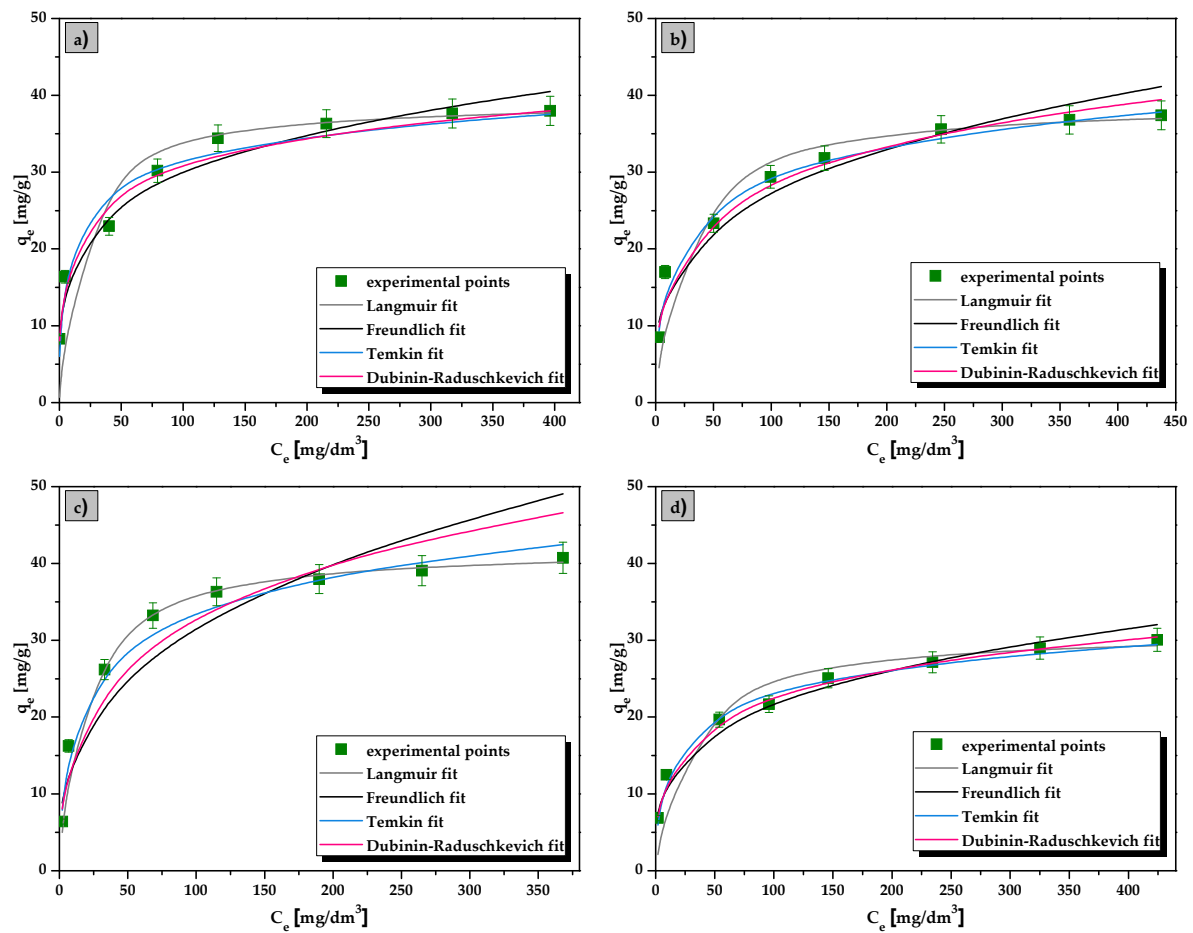

**Figure S8.** Nonlinear fitting of isotherm models for (a) La(III), (b) Ce(III), (c) Pr(III), and (d) Nd(III) ions sorption on raw lignin at 333 K.
